1 A Simple RT-PCR Melting temperature Assay to Rapidly Screen for Widely Circulating SARS-CoV-2  
2 Variants.

3

4 Padmapriya Banada<sup>a</sup>, Raquel Green<sup>a</sup>, Sukalyani Banik<sup>a</sup>, Abby Chopoorian<sup>a</sup>, Deanna Streck<sup>b</sup>, Robert Jones<sup>c</sup>,  
5 Soumitesh Chakravorty<sup>a,d</sup> and David Alland<sup>a</sup>

6 <sup>a</sup>Public Health Research Institute; Center for Emerging Pathogens, Rutgers New Jersey Medical School;

7 <sup>b</sup>Institute of Genomic Medicine, Rutgers New Jersey Medical School, Newark, NJ; <sup>c</sup>Craic Computing LLC,

8 Snohomish, WA ; <sup>d</sup>Cepheid, Sunnyvale, CA.

9 Running Head: SARS-CoV-2 variant strain detection

10 Key words: SARS-CoV-2, Variants, N501Y, E484K, melting temperature (T<sub>m</sub>), screening test.

11

12

13 **Abstract.**

14 **Background.** The increased transmission of SARS-CoV-2 variants of concern (VOC) which originated in  
15 the United Kingdom (B.1.1.7), South Africa (B1.351), Brazil (P.1) and in United States (B.1.427/429)  
16 requires a vigorous public health response, including real time strain surveillance on a global scale.  
17 Although genome sequencing is the gold standard for identifying these VOCs, it is time consuming and  
18 expensive. Here, we describe a simple, rapid and high-throughput reverse-transcriptase PCR (RT-PCR)  
19 melting temperature (T<sub>m</sub>) screening assay that identifies these three major VOCs. **Methods.** RT-PCR  
20 primers and four sloppy molecular beacon (SMB) probes were designed to amplify and detect the SARS-  
21 CoV-2 N501Y (A23063T) and E484K (G23012A) mutations and their corresponding wild type sequences.  
22 After RT-PCR, the VOCs were identified by a characteristic T<sub>m</sub> of each SMB. Assay optimization and  
23 testing was performed with RNA from SARS-CoV-2 USA WA1/2020 (WT), a B.1.17 and a B.1.351 variant  
24 strains. The assay was then validated using clinical samples. **Results.** The limit of detection (LOD) for both  
25 the WT and variants was 4 and 10 genomic copies/reaction for the 501 and 484 codon assays, respectively.  
26 The assay was 100% sensitive and 100% specific for identifying the N501Y and E484K mutations in  
27 cultured virus and in clinical samples as confirmed by Sanger sequencing. **Conclusion.** We have developed  
28 an RT-PCR melt screening test for the three major VOCs which can be used to rapidly screen large numbers  
29 of patient samples providing an early warning for the emergence of these variants and a simple way to track  
30 their spread.

31

## 32 **Introduction.**

33 In December 2020, public health officials in the United Kingdom observed a surge of COVID-19 cases in  
34 Kent, England that appeared to be largely due to a specific variant of SARS-CoV-2 (1, 2). The new variant  
35 was named Variant of Concern (VOC 202012/1) or B.1.1.7 based on its phylogenetic lineage. Early reports  
36 suggested that B.1.1.7 was more transmissible and possibly more virulent than previous SARS-CoV-2  
37 strains (3, 4), although the evidence did not suggest that B.1.1.7 caused a decrease in vaccine efficacy (5-  
38 8). The B.1.1.7 variant has a number of mutations in the spike protein including single nucleotide  
39 polymorphisms (SNPs) resulting in N501Y, A570D, D614G and P681H mutations, and deletions at amino  
40 acids 69-70 and 144Y (6, 9). The N501Y (A23063T) mutation has been identified as an important  
41 contributor to the worrisome phenotype (2, 4, 10, 11). Other SARS-CoV-2 strain variants have been  
42 implicated in large outbreaks in South Africa (known as 20H/501Y.V2 or B.1.351 lineage) and Brazil  
43 (20J/501Y.V3 or P.1 lineage) (12). These variants appear to have decreased the efficiency of some COVID-  
44 19 vaccines (2, 13, 14). All three, B.1.1.7, B.1.351 and P.1 variants contain the N501Y mutation, while the  
45 South African and Brazilian variants additionally contain mutations in E484K and K417N (1, 12). Thus,  
46 the N501Y mutation appears to be an excellent marker for all three strains while the E484K mutation can  
47 be used to differentiate the other two strains from B.1.1.7. New SARS-CoV-2 variants have also been  
48 recently reported in the United States (5, 15). Most of the new variants also have mutations at the 501 and/or  
49 484 position, although additional mutations such L452R have also been reported (15); however, the  
50 epidemiological and clinical relevance of these new variants are still not well understood.

51 All three of the major SARS-CoV-2 N501Y variants are circulating around the world (1). However, the  
52 distribution, extent, and spread of these variants are poorly understood in countries such as the United States  
53 where only a small fraction (0.04 to 3.5%) of COVID-19 cases are analyzed by viral genomic sequencing  
54 as per the CDC's national genomic surveillance dashboard (16). Viral genome sequencing is currently the  
55 only method available to reliably detect rapidly emerging SARS-CoV-2 variants. Genomic sequencing has  
56 the advantage of providing a detailed map of new mutations, which supports new variant discovery as well

57 as monitoring the exact type of the variant. However, genomic sequencing is expensive and difficult to  
58 perform in real time. In contrast, RT-PCR testing for SARS-CoV-2 has become widespread. This diagnostic  
59 approach is easy to perform in a high throughput manner, and rapid turnaround times are possible. However,  
60 routine RT-PCR tests do not differentiate among SARS-CoV-2 variants, or do so only by producing  
61 negative assay results (17), which still require sequence confirmation (18). Furthermore, the potential for  
62 additional mutations to appear near key variant-defining alleles may complicate the development of RT-  
63 PCR assays for SARS-CoV-2 variants (19). We have previously demonstrated that sloppy molecular  
64 beacons (SMBs) combined with melting temperature ( $T_m$ ) code analysis may be used to specifically detect  
65 mutations in short genomic regions where a variety of mutations can exist (20).

66 Here, we apply this same  $T_m$ -based approach to detect and differentiate variant strains of SARS-CoV-2  
67 with high sensitivity and specificity. This approach is flexible and can be used in high throughput manner,  
68 easily allowing the addition of new mutation detecting assays as needed to identify and track new SARS-  
69 CoV-2 variants as they emerge. Furthermore, this approach can be performed on a wide range of real-time  
70 PCR instrumentation as long as they have the capacity to run melt curve analysis. The wide availability of  
71 such instruments can allow quick adoption of this assay around the world, increasing access to real-time  
72 monitoring of SARS-CoV-2 variant spread.

### 73 **Methods.**

74 **Ethical considerations.** The use of de-identified clinical samples from confirmed COVID-19 positive and  
75 negative patients for PCR testing and sequencing was approved by the Rutgers Institutional Review Board  
76 under protocol numbers 20170001218 and 2020001541.

77 **Viral cultures and RNA.** Genomic RNA from SARS-CoV-2 USA WA1/2020 (wild type, WT), viral  
78 culture stocks of SARS-CoV-2 hCoV-19/England/204820464/2020 (B.1.1.7 variant, 501-MT) and SARS-  
79 CoV-2 Isolate hCoV-19/South Africa/KRISP-K005325/2020 (B.1.351 variant, 484-MT) were obtained

80 from BEI Resources, NIAID (Manassas, VA). RNA was isolated from both the variant strains in a BSL3  
81 laboratory, using RNAdvance viral RNA extraction kit (Beckman Coulter, Indianapolis, IN).

82 **Genome sequence analysis for assay design.** For initial analysis of the mutations in SARS-CoV-2, a total  
83 of 330,132 high quality viral genome sequences deposited in GISAID (21) as of Jan 12, 2021, were  
84 analyzed. Publicly available datasets were analyzed in this study. This data can be found here:  
85 <https://www.gisaid.org/>. A 250-nucleotide region around the N501Y (A23063T) and E484K (G23012A)  
86 positions in the reference strain (GenBank accession number MN908947) was selected and used to identify  
87 the corresponding regions in the GISAID dataset using BLAST (22). These matching sequences were  
88 condensed into a set of unique sequences and aligned using a multiple sequence alignment program,  
89 MAFFT (23). Candidate amplification primers and probes were identified on the basis of sequence  
90 conservation and predicted T<sub>m</sub> using the algorithm of SantaLucia (24) and final set of primers were  
91 designed with the help of the Primer3 program (25). SMB probe design was performed using the web  
92 servers DNA mfold (<http://www.unafold.org/mfold/applications/dna-folding-form.php>) and DINAmelt  
93 (<http://www.unafold.org/hybrid2.php>) to predict the probe folding structures and probe-target hybrid T<sub>m</sub>  
94 values respectively.

95 **Primers and Probes.** The list of primers and probes used for the 501 variant (SMB-501) and the 484 variant  
96 (SMB-484) assays are shown in Table 1. Both assays were run as two separate reactions. For the SMB-501  
97 assay an 89 bp region surrounding the 23063 position was amplified using an asymmetric PCR. For SMB-  
98 484 assay, a 76bp region surrounding the 23012 position was amplified using an asymmetric PCR. Sloppy  
99 molecular beacons (SMB) were designed targeting both the wild type 501N/484E (23063A/23012A) and  
100 the mutant 501Y/484K (23063T/23012G) sequences (SMB-501-MT). Primers were obtained from  
101 Millipore Sigma (The Woodlands, TX) and SMBs were synthesized by LGC Biosearch technologies  
102 (Petaluma, CA). An internal control (IC) assay developed by CDC (26, 27), targeting the human RNaseP  
103 gene was simultaneously performed for each extracted RNA specimen as a separate reaction in a separate

104 well, using the *TaqMan* real-time PCR assay probe tagged with FAM at the 5' end and Dabcyl quencher at  
105 the 3' end.

106 **SMB-assay formulation and procedure.** TaqPath™ 1-Step RT-qPCR Master Mix, CG (ThermoFisher  
107 Scientific, Waltham, MA) was used for the RT-PCR. Each one step reaction mix was supplemented with  
108 0.2µM of the forward primer 501-F/484-F and 2 µM/4 µM of the reverse primer 501-R/484-R, 0.4 µM of  
109 each of the SMB probes (SMB-501-WT and SMB-501-MT/ SMB-484-WT and SMB-484-MT) and 1 µl of  
110 the template RNA (note that the concentration of the forward primers did not match the concentration of  
111 the reverse primers so as to create an asymmetric PCR) . The internal control contained primers and a probe  
112 specific for human RNaseP as described previously (26, 27). Each reaction was run in replicates of 4 in  
113 384-well plates in a Roche LightCycler 480 (Roche, Indianapolis, IN). The one-step RT-PCR amplification  
114 was performed with the following thermocycling conditions: Uracil DNA glucosylase incubation for 2 min  
115 at 37°C and reverse transcription (RT) for 15 min at 50°C, followed by asymmetric PCR for 45 cycles  
116 (denaturation at 95 °C for 1 s, annealing/extension at 55°C for 30 s). The post-PCR melt was performed  
117 with the following conditions: denaturation at 95°C for 30s followed by cooling down to 45°C and gradual  
118 heating to 85°C, with continuous monitoring of fluorescence at the rate of 2 acquisitions per °C. The total  
119 assay time was 1h 17min. Automated T<sub>m</sub> calls were performed by the LC480 T<sub>m</sub> detection software at the  
120 end of the PCR. The resulting T<sub>m</sub> for each probe was identified and matched with the T<sub>m</sub>-signature code  
121 defined for the wildtype or the mutant variants.

122 **Analytical sensitivity.** The pre-quantitated genomic RNA from the SARS-CoV-2 USA WA1/2020 (WT)  
123 obtained from BEI resources with the stock concentration of 1.8 x10<sup>4</sup> genomic equivalents (GE)/µl was  
124 diluted in Tris-EDTA (TE) buffer. A 1 µl of each concentration (400, 200, 40, 20 and 4 GE/µl for 501 assay  
125 and 1000, 500, 100, 50 and 10 for 484 assay) was added to the one-step RT-PCR mix containing the primers  
126 and probes and was evaluated in the SMB-501 assay or the SMB-484 assay. The RNA extracted from both  
127 variant strains was quantified against a standard curve generated with the N1 gene-specific real time RT-  
128 PCR assay (26, 27) and the concentration was determined to be 4x10<sup>5</sup> GE/µl for B.1.17 and 7x10<sup>6</sup> GE/µl

129 for B.1.351 variant strain. The mutant RNA was also serially diluted and 1 µl of each concentration  
130 mentioned above was evaluated in both the assays.

131 **Validation with patient samples.** Deidentified nasopharyngeal (NP) swabs obtained from patients  
132 undergoing routine COVID-19 clinical testing using the Xpert Xpress SARS-CoV-2 or Xpert Xpress  
133 SARS-CoV-2/Flu/RSV (4-plex) test (Cepheid, Sunnyvale CA) assay in the CLIA and CAP certified  
134 laboratory at the Public Health Research Institute (PHRI), Newark, NJ, were selected for this study. NP  
135 swabs were collected in 3ml viral transport media (VTM) from Hardy diagnostics (Santa Maria, CA) or  
136 Labscoop (Little Rock, AR) and were banked at either refrigerated conditions (for specimens first tested  
137 within the previous 2 weeks) or frozen (for specimens stored longer than 2 weeks). The samples consisted  
138 of 46 randomly selected COVID-19 positive samples of unknown genotype and a RT-PCR cycle threshold  
139 (Ct) <42 with either Xpert Xpress SARS-CoV-2 or Xpert Xpress CoV-2/Flu/RSV test. Nine of the samples  
140 had been banked between October 2020 through December 31, 2020, 16 in the month of January 2021, 15  
141 in February 2021 and 6 in March 2021. Thirty COVID-19 negative specimens were randomly selected from  
142 samples banked between Oct 2020 through Feb 2021. RNA was extracted from each specimen using a  
143 QiaAmp viral RNA isolation kit, following the manufacturer's instructions (Qiagen, Valencia, CA) in a  
144 BSL2 laboratory. A 5µl volume of RNA was added to the one-step RT-PCR mix containing the primers  
145 and probes. A subset of these clinical samples consisting of 26/46 of the COVID-19 positive samples and  
146 19/30 of the COVID-19 negative samples were using the SMB-484 assay, mainly based on the continued  
147 availability of the sample for testing. The SMB-501, SMB-484 and the IC assays were tested in separate  
148 wells in replicates of two. The samples that failed the IC assay were repeated starting with the RNA  
149 extraction. A subset of samples that tested positive either for 501N/484E wildtype or 501Y/484K mutant  
150 was confirmed by Sanger sequencing using the primer pair: F-5'ctatcaggccggtagcacac3' and R-  
151 5'ctttcttttgaacttctacatg3' which amplifies a 143bp segment of the S-gene inclusive of the amino acid  
152 positions at 484 and 501. Sequencing chromatograms were analyzed using Ugene (ver 37) comparing  
153 against the known WT and MT sequences using MegAlign Pro software (DNASar, ver16).

154 **Statistical analysis.** Standard statistical analyses (average, standard deviation) and graphing were  
155 performed using Microsoft excel (ver 2102) and GraphPad Prism 8.4.3 for Windows.

## 156 **Results.**

157 **Limit of detection.** The one-step RT mix containing asymmetric PCR primers and both wildtype and MT  
158 specific probes was added with either WT RNA or MT RNA at different concentrations ranging from 400  
159 to 4 GE/reaction (N=4) for SMB-501 assay and from 1000 to 10 GE/reaction for SMB-484 assay. After T<sub>m</sub>  
160 analysis was performed the T<sub>m</sub> peak heights were highest in the assays with the largest added number of  
161 GE and the peak heights progressively decreased as the number of GEs present in the reactions decreased.  
162 However, T<sub>m</sub> peak heights produced by both SMB 501-WT/ SMB 484-WT and SMB 501-MT/ SMB 484-  
163 MT could still be reproducibly detected at the lowest concentration tested (4 or 10 GE/reaction) when tested  
164 against both WT and N501Y mutant strains, defining the assay limit of detection as  $\leq 4$  GE per reaction for  
165 SMB-501 or  $\leq 10$  GE/reaction for SMB-484 assay (Fig. 1).

166 **T<sub>m</sub> code definition.** The T<sub>m</sub> values produced by both SMBs against the reference WT and the MT SARS-  
167 CoV-2 strains are listed in Table 2. The mean and standard deviations shown were derived from at least 4  
168 replicates. When reference RNA was tested with the SMB 501-WT probe, WT-RNA produced a T<sub>m</sub> of  
169  $59.8 \pm 0.4^\circ\text{C}$  and MT N501Y RNA produced a T<sub>m</sub> of  $55.2 \pm 0.4^\circ\text{C}$ . Similarly, when RNA was tested with the  
170 SMB 501-MT probe, WT-RNA produced a T<sub>m</sub> of  $58.2 \pm 1^\circ\text{C}$ , and MT N501Y RNA produced a T<sub>m</sub> of  
171  $62.25 \pm 0.6^\circ\text{C}$ . Given that T<sub>m</sub> values can vary slightly between clinical samples, we specified a two-  
172 temperature T<sub>m</sub> code that identified either 501N or 501Y alleles within a T<sub>m</sub> range of approximately 1.5-  
173 4 times the experimentally verified  $\pm$ SD values for each probe T<sub>m</sub>. Thus, the 501N (WT) T<sub>m</sub> code was  
174 defined as a SMB-501-WT T<sub>m</sub> of  $59.8 \pm 1.5^\circ\text{C}$  and a SMB-501-MT T<sub>m</sub> of  $58.2 \pm 1.5^\circ\text{C}$ ; and a 501Y (MT)  
175 T<sub>m</sub> code was defined as a SMB-501-WT T<sub>m</sub> of  $55.2 \pm 1.5^\circ\text{C}$  and a SMB-501-MT T<sub>m</sub> of  $62.25 \pm 1.5^\circ\text{C}$ .  
176 Similarly, for SMB-484 assay, the reference T<sub>m</sub> code for 484E (WT) was  $64 \pm 0.1$  (with SMB-484-WT  
177 probe) and  $58.7 \pm 0.4$  (with SMB-484-MT probe); and the reference T<sub>m</sub> code for 484K (MT) was  $59.7 \pm 0.5$   
178 (WT probe) and  $63 \pm 0.6$  (MT-probe). Any samples that failed to produce a T<sub>m</sub> value for either of the SMBs



179 or produced T<sub>m</sub> values outside of the range defined for the T<sub>m</sub> codes would have been defined as  
180 indeterminate and the assay repeated. Using this code definition, we retested our reference RNA samples  
181 20 times, and the correct 501/484 allele was detected in each case, achieving an analytic sensitivity and  
182 specificity of 100%. These results clearly indicate that the combination of both SMB 501-WT and SMB  
183 501-MT probes can specifically detect and differentiate the N501Y variants from the wild type strains with  
184 high confidence.

185 **Validation with patient samples.** A total of 76 patient samples, 46 confirmed COVID-19 positive and 30  
186 confirmed COVID-19 negative, were tested using the SMB-501 assay. A subset of 45 of these same samples  
187 (26 COVID-19 positive and 19 COVID negative) were additionally validated with the SMB-484 assay.  
188 None of the COVID-19 negative samples produced any measurable T<sub>m</sub> values from either of the assays,  
189 yielding a specificity of 100%. Positive samples were selected based on a wide range of N2-Ct values  
190 between 16 through 41 based on the Xpert Xpress SARS-CoV-2 assay. As shown in Table 2, 40/45 (89%)  
191 of the COVID-19 positive samples produced measurable T<sub>m</sub> values for both SMB probes in the SMB-501  
192 assay, in at least one of the two replicates. Two samples were identified as indeterminate based on the  
193 inability of either the WT or MT probe to generate a measurable T<sub>m</sub> and/or due to the presence of a failed  
194 internal control. There were also 5 assays from previously positive clinical samples, which generated  
195 negative results in that neither probe produced a measurable T<sub>m</sub>. All the negative assays had shown an  
196 initial Xpert Ct values  $\geq 35$ . Although, many of the samples with Xpert Ct values as late as 39 could still  
197 be detected by our assay, we found that the samples with a Ct  $\geq 35$  using the Xpert assay, yielded relatively  
198 stunted melt peak heights of  $\leq 0.3$  with the WT-SMB and  $\leq 0.1$  with MT-SMB similar to that observed when  
199 testing 4 GE in our limit of detection studies, which is indicative of very low viral loads in these samples.  
200 However, the T<sub>m</sub> could still be identified for at least one of the 501 SMB probes in all samples, except the  
201 negatives. Overall, 27/45 (60%) of the COVID-19 positive samples had SMB 501-WT and SMB 501-MT  
202 T<sub>m</sub> values consistent with the WT N501 allele and 11/45 (24.4%) of the samples had T<sub>m</sub> values consistent  
203 with mutant Y501 allele within  $\pm 1$ -standard deviation of our reference standards (Table 1, Fig. 2). Twelve

204 representative WT and mutant samples as predicted by the SMB assay, underwent Sanger sequencing of  
205 the PCR products for confirmation of the PCR results. In all cases, the WT or mutant sequences identified  
206 by the SMB N501Y assay were confirmed by the sequencing result. Using the confirmed sequencing results  
207 as a gold standard, 4/4 of the wild type clinical samples were detected as WT by the SMB N501Y assay,  
208 and 8/8 N501Y mutant results were detected as mutant by the assay, demonstrating a clinical sensitivity  
209 and specificity of 100%. Similarly, with the SMB-484 assay, 19/26 (73%) of the samples tested were wild  
210 type and 4/26 (15.3%) were variants. Out of the 4 variants, 4/4 were sequenced and confirmed to harbor  
211 the G>A mutation in the 484<sup>th</sup> codon, yielding an assay specificity of 100% compared to sequencing. It  
212 should be noted that one of the specimens (SMBP-27) contained a E484K mutation but was found to have  
213 a WT sequence at codon 501. Considering that the major three VOCs contain either N501Y alone (B.1.1.7)  
214 or both N501Y and E484K mutations (B.1.351 and P.1), the presence of this single 484K mutant might  
215 indicate that this sample contains the variant of interest B.1.525/B.1.526, which originated in New York  
216 City. Thus, the combination of our SMB 501 and SMB-484 assays should help capture most of the variants  
217 in circulation. We also observed that the frequency of N501Y and E484K variants increased substantially  
218 between the clinical samples obtained in October 2020 and the samples obtained in February and March  
219 2021 (Fig. 3).

## 220 **Discussion.**

221 The emergence of SARS-CoV-2 VOC with the potential for increased transmission, disease severity, and  
222 resistance to vaccine induced immunity is of grave concern (14, 28). A simple screening assay to monitor  
223 the emergence and spread of these strains may be helpful for implementing public health strategies to  
224 counter these and future strains. Our study demonstrates that our assay is simple, rapid, and sensitive and  
225 specific for detecting key variant-identifying mutations using a high-throughput PCR assay platform. Thus,  
226 this assay has the potential for relatively inexpensive high throughput testing for rapid identification of  
227 N501Y, E484K variants. In designing this assay, we took advantage of the fact that the N501Y and E484K  
228 mutations are common in the major SARS-CoV-2 variants. Since this mutation also appears to be

229 responsible for the increased infectivity and possibly the other adverse manifestations of these strains (4),  
230 assays which detect this mutation may also prove useful to detect any future strain that evolves to have  
231 increased transmission potential.

232 Our assay is the first to our knowledge that uses post PCR T<sub>m</sub> based analysis to detect and differentiate  
233 SARS-CoV-2 variants using SMB probes demonstrated in clinical samples. This assay format has the  
234 benefit of producing a measurable T<sub>m</sub> result irrespective of whether the SMB probe is fully complementary  
235 to its target nucleic acid sequence. Instead of detecting a mutation by either producing or not producing a  
236 signal, SMBs detect mutations by producing a T<sub>m</sub> shift. Failure to produce a T<sub>m</sub> signal indicates an invalid  
237 assay rather than the absence of a mutation. The robustness of our assay is further increased by our use of  
238 two different SMBs, one complementary to the WT sequence and one complementary to the mutant  
239 sequence. The pattern of T<sub>m</sub> values or “T<sub>m</sub> signature” produced by the combined T<sub>m</sub> values of each SMB  
240 probe provides an unequivocal identification of a WT or MT sequence. We have also shown that T<sub>m</sub>  
241 signatures can be used to detect mixtures of mutant and WT sequences and to identify numerous mutations  
242 present in an assay’s target region (29). Thus, we expect that our assay should continue to be able to identify  
243 N501Y and E484K variants even if additional mutations develop near this primary mutation within the  
244 probe-footprint region once the specific T<sub>m</sub> signatures of each new genotype are characterized. Our assay  
245 is meant to be a screening assay which will identify samples likely to contain SARS-CoV-2 variants of  
246 concern. Although in this study, we have proposed to use the combination of two probes per assay for  
247 increased accuracy, we expect that most SARS CoV-2 variants can be identified using only the MT-probe  
248 alone, and future versions of our assay are likely to use a single SMB to identify mutations that are less  
249 critical than N501Y and E484K. We suggest that a useful public health strategy would be to screen COVID-  
250 19 positive samples in near real time with our assay, and then to perform genomic sequencing on a subset  
251 of screen-positive samples. This sequencing would confirm the presence of the expected variants and in  
252 some cases lead to the discovery of new variants. Ongoing sequencing of a subset of all SARS-CoV-2  
253 samples will also be required to identify completely novel variants or to investigate the epidemiology and

254 clinical characteristics of variants such as those recently reported in the United States. Fortunately, our  
255 assay is easily extensible and additional tests for new key mutations can be added in a modular format to a  
256 screening panel when new mutations associated with critical new variants are discovered. In fact, it is our  
257 intention to continuously update this assay until our work is superseded by a better approach or much more  
258 widespread genome sequencing becomes commonplace. Key updates will also be posted on a preprint  
259 journal. In the meantime, we hope that our current test will help increase surveillance and potentially help  
260 control the spread of the new emerging variants of concern.

261 **Acknowledgements.** This study was funded by the National Institute of Allergy and Infectious Diseases of  
262 the National Institutes of Health under award number R01 AI131617. The following reagent was deposited  
263 by the Centers for Disease Control and Prevention and obtained through BEI Resources, NIAID, NIH:  
264 Genomic RNA from SARS-Related Coronavirus 2, Isolate USA-WA1/2020, NR-52285. The following  
265 reagent was obtained through BEI Resources, NIAID, NIH: Severe Acute Respiratory Syndrome-Related  
266 Coronavirus 2, Isolate hCoV-19/England/204820464/20200, NR-54000, contributed by Bassam Hallis. The  
267 authors wish to thank all the laboratories that contribute sequence data to the GISAID EpiCoV database. A  
268 GISAID acknowledgment table reporting the geographic origin and contributions of genomes analyzed in  
269 this study is attached as a supplementary Table 1S.

270 D.A. receives research support and royalty payments from Cepheid, which sells the Xpert Xpress SARS-  
271 CoV-2 and Xpert Xpress SARS-CoV-2/Flu/RSV tests., S.C. is an employee of Cepheid and R.J. is a paid  
272 consultant for Cepheid.

273

274

275

276 **FIGURE LEGENDS.**

277 **Fig. 1. Analytical limit of detection and T<sub>m</sub> values generated by the SMB-501 (A and B) and SMB-**  
278 **484 (C and D) assays tested against SARS-CoV-2 RNA. A and C- SARS-CoV-2 wildtype (WT) RNA;**  
279 **B- B.1.1.7 mutant (MT) RNA and D- B.351 mutant (MT) RNA at the indicated number of genomic**  
280 **equivalents (GEs).**

281  
282 **Fig. 2. The effect of target concentration on the melt peak height generated by the SMB-501 (A and**  
283 **B) and SMB-484 (C and D) assays tested against SARS-CoV-2 RNA. A and C- SARS-CoV-2 wildtype**  
284 **(WT) RNA; B- B.1.1.7 mutant (MT) RNA and D- B.351 mutant (MT) RNA at the indicated number of**  
285 **genomic equivalents (GEs).**

286  
287 **Fig. 3. Sloppy molecular beacon (SMB) T<sub>m</sub> profile of positive clinical nasopharyngeal (NP) samples**  
288 **tested using the SMB-501 and SMB-484 T<sub>m</sub> assay. T<sub>m</sub> signatures consisting of the T<sub>m</sub> values for both**  
289 **the WT probe (blue) and MT probe (orange) are shown for the SMB-501 assay (A) and the SMB-484 assay**  
290 **(B). Ref WT indicates the T<sub>m</sub> profile of the reference, WT SARS-CoV-2 strain and Ref MT indicates the**  
291 **T<sub>m</sub> profile of the reference MT SARS-CoV-2 B.1.1.7 strain (A) and B.351 (B). SMBP1 – SMBP46 indicate**  
292 **that T<sub>m</sub> profiles of the 46 COVID positive clinical samples tested in this study with SMB-501 assay and**  
293 **the 26 COVID positive samples tested by SMB-484 assay. Error bars show +/- one standard deviation.**

294  
295 **Fig.4. Prevalence of N501Y variant strains among the tested sample set over time. The proportion of**  
296 **N501Y and E484K variants is shown for samples obtained during the periods of October-November (n=9**  
297 **tested with SMB-501/n=3 tested with SMB-484), January (n=16/n=12), February (n=15/n=9) and the first**  
298 **week of March (n=6/n=2). No samples from December were tested in our study.**

299

300 Table 1. Primers and probes.

| Assay   | Primer/<br>Probe | 5'         | Sequence                                         | 3'    | Amplicon<br>size (bp) |
|---------|------------------|------------|--------------------------------------------------|-------|-----------------------|
| SMB-501 | 501-F            |            | ggttttaattgttactttcctttaca                       |       | 89                    |
|         | 501-R            |            | gaaagtactactactctgtatggttgg                      |       |                       |
|         | 501-WT           | Quasar 570 | CCGCgtt[pdU]ccatcccactaatgctg[pdU]tggttaccacGCGG | BHQ-2 |                       |
|         | 501-MT           | Quasar 670 | CGCGgtt[pdu]ccatcccacttatgctg[pdu]tggttaccacCGCG | BHQ-2 |                       |
| SMB-484 | 484-F            |            | ctatcaggccggtagcacac                             |       | 76                    |
|         | 484-R            |            | gaaaccatatgattgtaaaggaaag                        |       |                       |
|         | 484-WT           | Quasar 570 | CCGCGccttgtaatgggtgtaaaggtttaattgttacGCGCGG      | BHQ-2 |                       |
|         | 484-MT           | Quasar 670 | CCGCGccttgtaatgggtgtaaaggtttaattgttacGCGCGG      | BHQ-2 |                       |

301

302 The lowercase letter indicates the SMB probe region and the uppercase letter indicate the SMB stem region and pdU -C5 Propynyl-deoxyuridine

303 and BHQ indicates “black hole quencher”.

304

305

306 Table 2. Assay and Sanger sequencing results from COVID positive clinical samples.

| Samples      | Date of 1st test (dd/mm/yy) | PCR Ct* | SMB-501 assay             |                           |     | SMB-484 assay             |                           |     | Confirmation by sequencing† |                        |                        |
|--------------|-----------------------------|---------|---------------------------|---------------------------|-----|---------------------------|---------------------------|-----|-----------------------------|------------------------|------------------------|
|              |                             |         | WT probe (Cy3)<br>Tm (°C) | MT probe (Cy5)<br>Tm (°C) | Id  | WT probe (Cy3)<br>Tm (°C) | MT probe (Cy5)<br>Tm (°C) | Id  | Wild type                   | N501Y mutant (AAT-TAT) | E484K mutant (GAA-AAA) |
| WT-Reference |                             |         | 59.8±0.4                  | 58.2±1                    | WT  | 64±0.1                    | 58.7±0.4                  | WT  | Yes                         | No                     | No                     |
| MT-Reference |                             |         | 55.2±0.4                  | 62.2±0.6                  | MT  | 59.7±0.5                  | 63±0.6                    | MT  | No                          | Yes                    | No                     |
| SMBP-1       | Oct-Nov 2020                | 29.1    | 59.9                      | 58.4                      | WT  | 63.9                      | 58.2                      | WT  | Yes                         | No                     | No                     |
| SMBP-2       |                             | 34.8    | NP                        | NP                        | Neg |                           |                           |     |                             |                        |                        |
| SMBP-3       |                             | 34.5    | NP                        | NP                        | Neg | 64.0                      | 58.7                      | WT  |                             |                        |                        |
| SMBP-4       |                             | 35.4    | NP                        | NP                        | Neg |                           |                           |     |                             |                        |                        |
| SMBP-5       |                             | 39.2    | 59.5                      | 58.2                      | WT  |                           |                           |     |                             |                        |                        |
| SMBP-6       |                             | 36.0    | 59.1                      | 58.2                      | WT  |                           |                           |     | Yes                         | No                     | No                     |
| SMBP-7       |                             | 33.7    | 58.9                      | 58.1                      | WT  | 64.0                      | NP                        | Ind |                             |                        |                        |
| SMBP-8       |                             | 36.8    | 59.5                      | 58.2                      | WT  |                           |                           |     |                             |                        |                        |
| SMBP-9       |                             | 27.9    | 59.4                      | 58.3                      | WT  |                           |                           |     |                             |                        |                        |
| SMBP-10      | Jan 2021                    | 29.4    | 59.3                      | 58.3                      | WT  | 63.8                      | 58.2                      | WT  | Yes                         | No                     | No                     |
| SMBP-11      |                             | 39.1    | 59.9                      | 58.6                      | WT  |                           |                           |     |                             |                        |                        |
| SMBP-12      |                             | 33.8    | 59.0                      | 58.2                      | WT  | 64.3                      | 58.8                      | WT  | Yes                         | No                     | No                     |
| SMBP-13      |                             | 17.7    | 59.3                      | 58.5                      | WT  | 64.2                      | 58.9                      | WT  | Yes                         | No                     | No                     |
| SMBP-14      |                             | 21.3    | 59.4                      | 58.5                      | WT  | 64.2                      | 58.8                      | WT  | Yes                         | No                     | No                     |
| SMBP-15      |                             | 17.5    | 59.1                      | 58.3                      | WT  | 64.0                      | 58.7                      | WT  | Yes                         | No                     | No                     |
| SMBP-16      |                             | 30.0    | 55.5                      | 62.6                      | MT  | 64.2                      | 58.5                      | WT  | No                          | Yes                    | No                     |
| SMBP-17      |                             | 41.2    | NP                        | NP                        | Neg |                           |                           |     |                             |                        |                        |
| SMBP-18      |                             | 23.2    | 59.8                      | 58.9                      | WT  | 64.0                      | 58.7                      | WT  |                             |                        |                        |
| SMBP-19      |                             | 28.3    | 59.3                      | 58.1                      | WT  | 63.8                      | 58.2                      | WT  | Yes                         | No                     | No                     |
| SMBP-20      |                             | 17.1    | 59.2                      | 58.3                      | WT  | 64.0                      | 58.8                      | WT  | Yes                         | No                     | No                     |
| SMBP-21      |                             | 16.4    | 59.2                      | 58.4                      | WT  | 64.2                      | 58.9                      | WT  | Yes                         | No                     | No                     |
| SMBP-22      |                             | 18.2    | 58.9                      | 58.1                      | WT  |                           |                           |     | Yes                         | No                     | No                     |
| SMBP-23      |                             | 21.1    | 58.9                      | 58.1                      | WT  | 64.1                      | 58.6                      | WT  | Yes                         | No                     | No                     |
| SMBP-24      |                             | 39.0    | 59.5                      | 58.2                      | WT  |                           |                           |     |                             |                        |                        |
| SMBP-25      |                             | 28.4    | 54.5                      | 61.6                      | MT  | 64.1                      | NP                        | Ind | No                          | Yes                    | No                     |
| SMBP-26      | Feb 2021                    | 27.8    | 54.5                      | 61.6                      | MT  | 63.9                      | 58.3                      | NP  | No                          | Yes                    | No                     |

|                      |            |      |      |        |     |      |      |     |     |     |     |
|----------------------|------------|------|------|--------|-----|------|------|-----|-----|-----|-----|
| SMBP-27              |            | 33.5 | 59.3 | 58.9   | WT  | 60.1 | 63.0 | MT  | Yes | No  | Yes |
| SMBP-28              |            | 38.3 | 59.7 | 58.5   | WT  | 64.1 | NP   | Ind | ND  | ND  | ND  |
| SMBP-29              |            | 18.1 | 58.9 | 58.1   | WT  | 64.1 | 58.8 | WT  | Yes | No  | No  |
| SMBP-30              |            | 27.8 | 59.2 | 58.2   | WT  |      |      |     |     |     |     |
| SMBP-31 <sup>a</sup> |            | 17.6 | 55.1 | 61.9   | MT  | 60.4 | 63.3 | MT  | No  | Yes | Yes |
| SMBP-32 <sup>a</sup> |            | 17.4 | 55.1 | 61.9   | MT  | 64.0 | 58.7 | WT  | No  | Yes | No  |
| SMBP-33              |            | 32.8 | 55.0 | 62.1   | MT  |      |      |     |     |     |     |
| SMBP-34              |            | 25.2 | 55.5 | 62.7   | MT  | 60.2 | 63.3 | MT  | No  | Yes | Yes |
| SMBP-35              |            | 18.4 | 55.6 | 62.5   | MT  | 60.5 | 63.4 | MT  | No  | Yes | Yes |
| SMBP-36              |            | 18.8 | 54.9 | 61.9   | MT  |      |      |     | No  | Yes | No  |
| SMBP-37              |            | 28.4 | 54.9 | 62.2   | MT  |      |      |     |     |     |     |
| SMBP-38              |            | 16.4 | 59.8 | 58.5   | WT  | 64.1 | 58.6 | WT  |     |     |     |
| SMBP-39              |            | 32.2 | NP   | NP     | Neg |      |      |     |     |     |     |
| SMBP-40              |            | 32.3 | 58.9 | 57.8   | WT  |      |      |     | Yes | No  | No  |
| SMBP-41              | March 2021 | 32.6 | 55.4 | 62.6   | MT  | 63.9 | 58.3 | WT  | No  | Yes | No  |
| SMBP-42              |            | 36.8 | 59.7 | 58.4   | WT  |      |      |     |     |     |     |
| SMBP-43              |            | 30.1 | 59.8 | 58.9   | WT  |      |      |     | Yes | No  | No  |
| SMBP-44              |            | 33.3 | NP   | NP     | Inv |      |      |     |     |     |     |
| SMBP-45              |            | 34.6 | NP   | 61.3   | Ind |      |      |     |     |     |     |
| SMBP-46              |            | 23.3 | 59.2 | 58.285 | WT  | 64.0 | 58.6 | WT  | Yes | No  | No  |

307

308 IC-internal control; WT-wildtype; MT-Mutant; NP- No Tm peak; Neg-Negative; ND- not Inv-Invalid; Ind-Indeterminate.

309 \*Xpert Xpress SARS-CoV-2 or Xpert Xpress SARS-CoV-2/Flu/RSV tests

310 †Representative strains were sequenced. <sup>a</sup>sequencing was repeated twice to confirm the identified mutations.

311 Blocked grey cells- Corresponding samples that are not tested by the SMB-484 assay or sequencing.



312

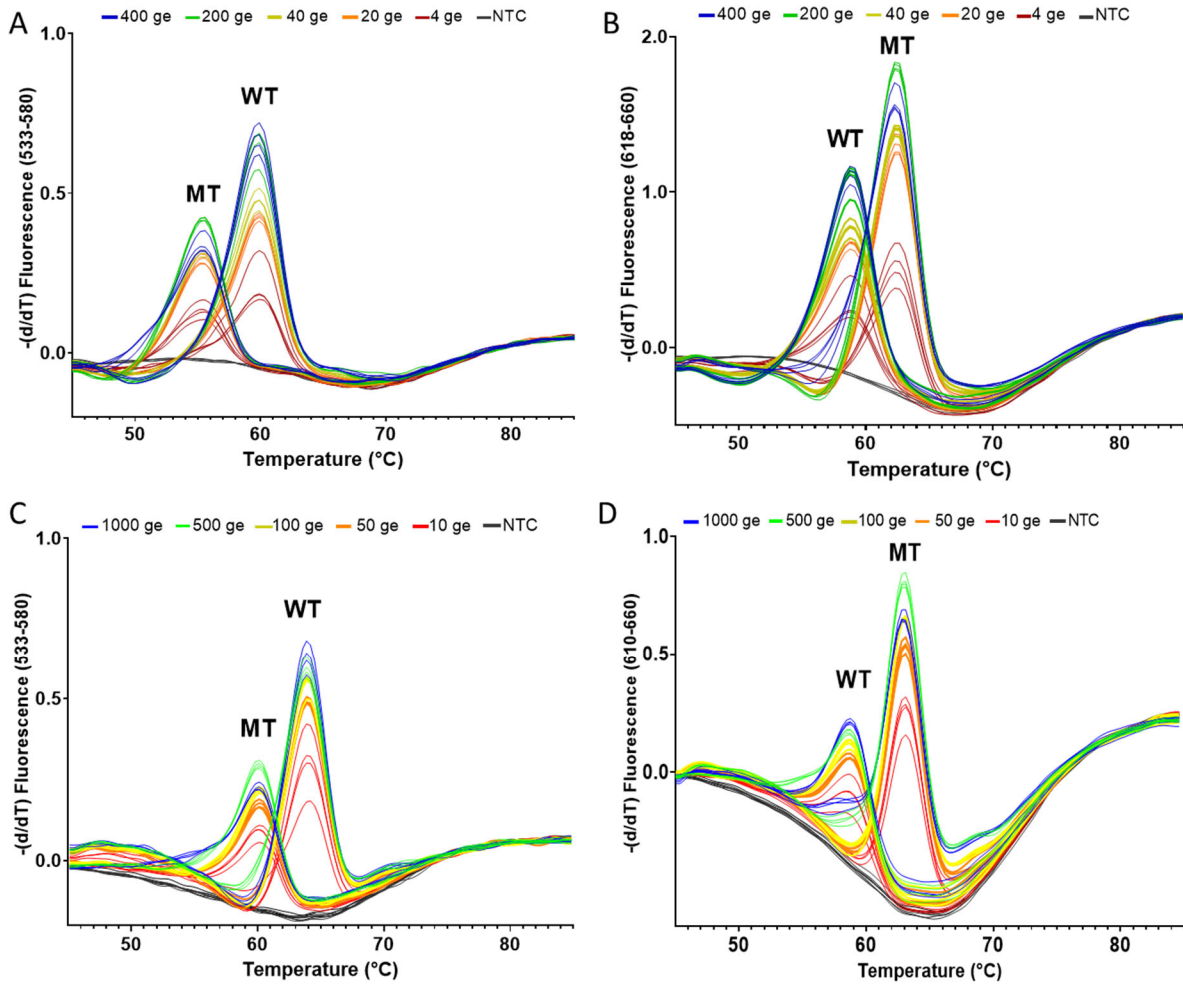

313

314

315 **Fig. 1.**

316

317

318

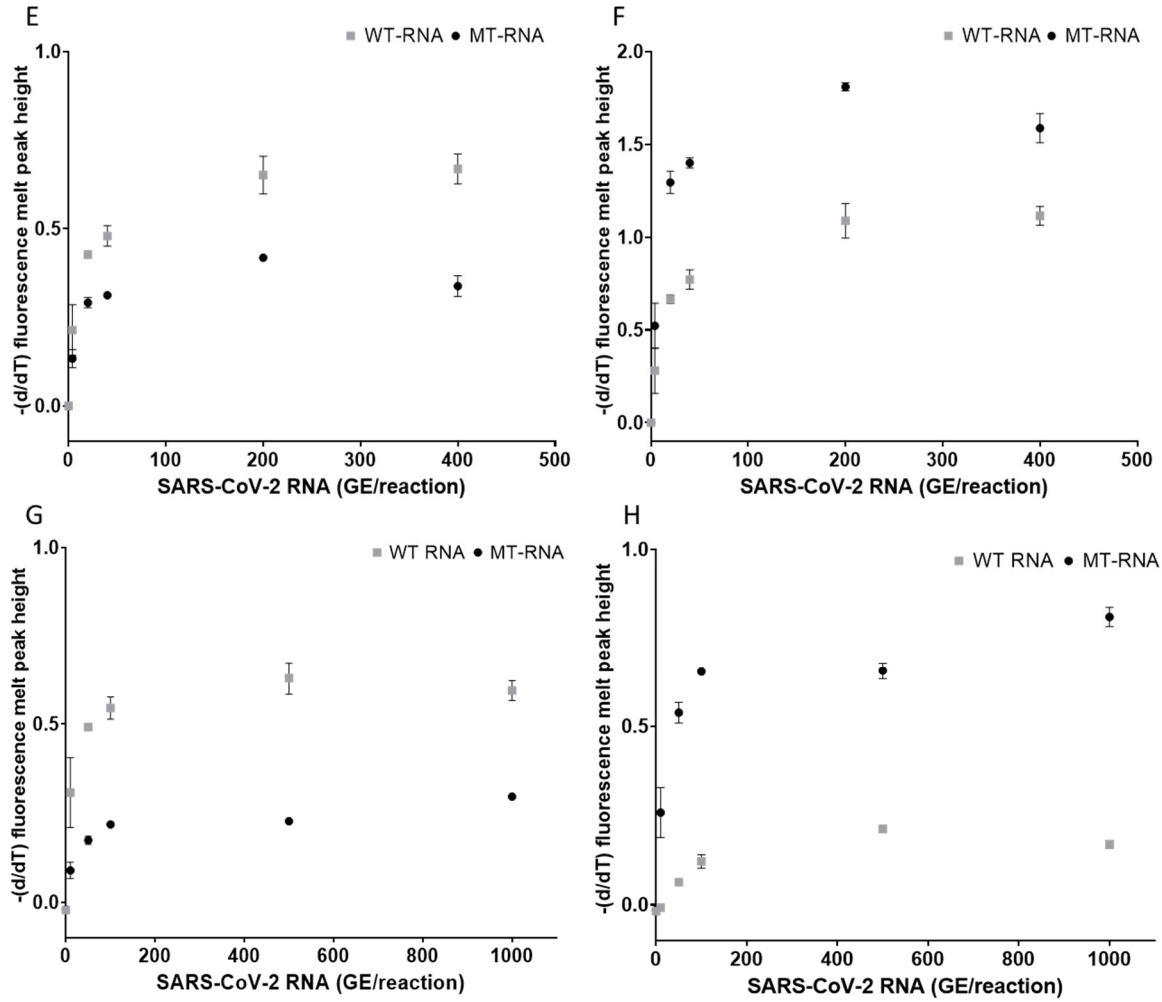

319

320

321 **Fig. 2.**

322

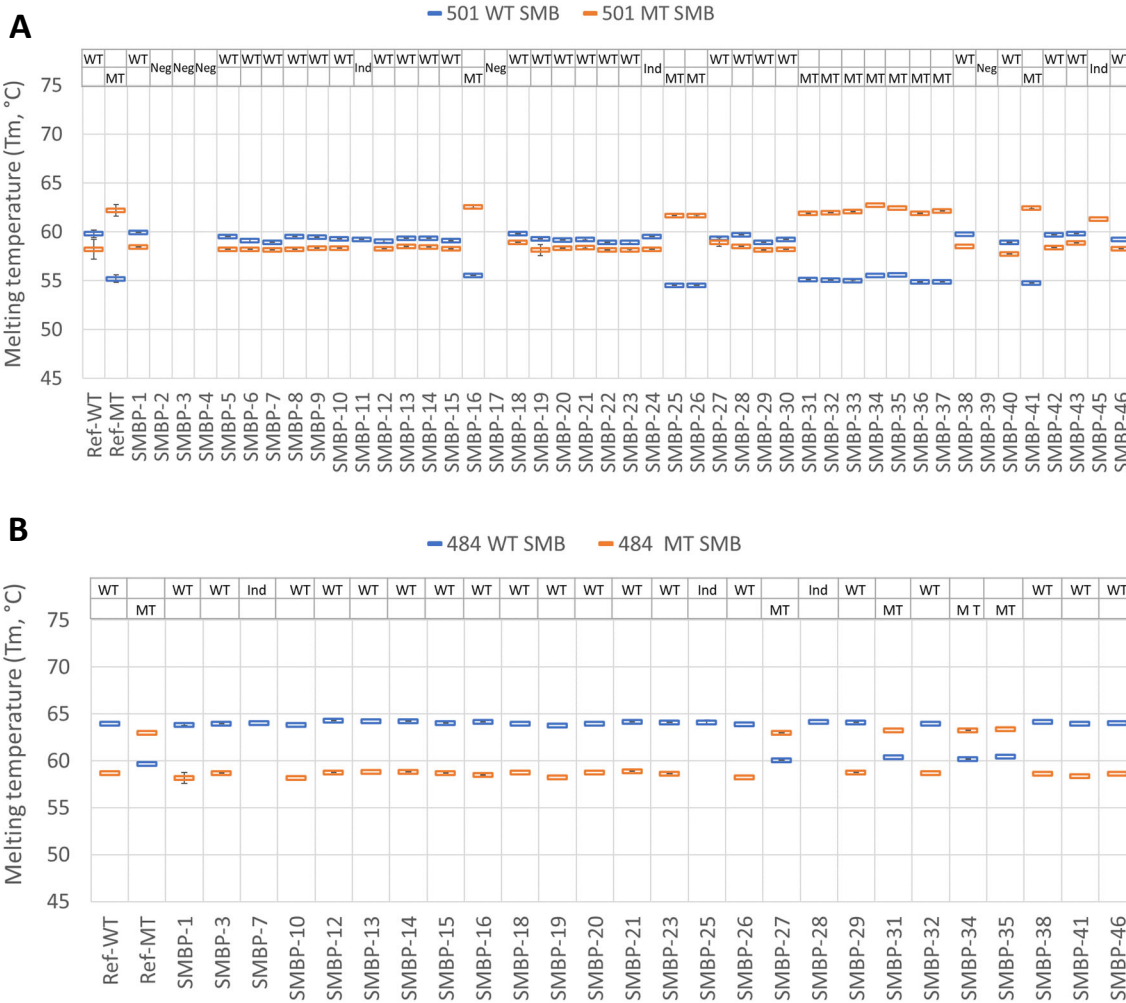

323

324 **Fig. 3.**

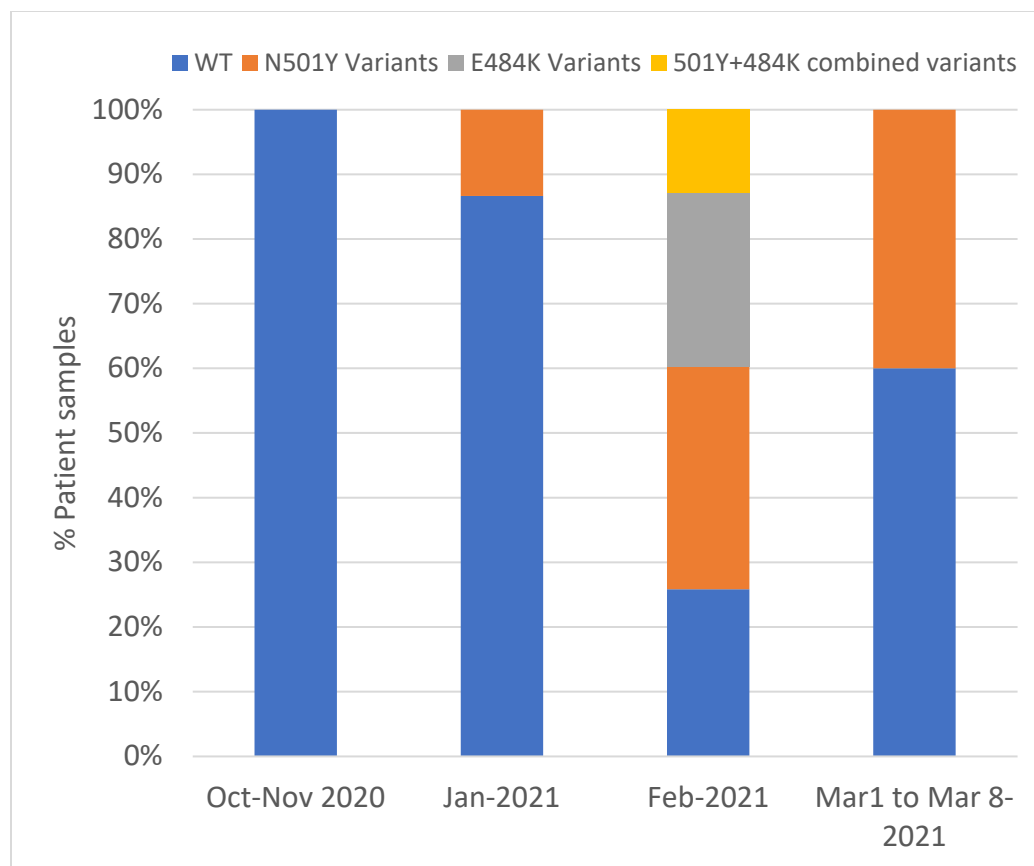

325

326 **Fig.4.**
